# Supplementary material for: Supervised Learning for Predictive Pore Size Classification of Regenerated Cellulose Membranes Based on Atomic Force Microscopy Measurements
Source: MDPI journal article supplement (doi:10.3390/ma14216724), 2021-11-08
Supplement: s1 [file s1]

# Supervised Learning for Predictive Pore Size Classification of Regenerated Cellulose Membranes Based on Atomic Force Microscopy Measurements

Alex Hadsell <sup>1</sup>, Huong Chau <sup>1,2</sup>, Richard Barber, Jr. <sup>2,3</sup>, Unyoung Kim <sup>1,2</sup> and Maryam Mobed-Miremadi <sup>1,\*</sup>

<sup>1</sup> Department of Bioengineering, Santa Clara University, Santa Clara, CA 95053, USA; ahadsell@scu.edu (A.H.); hchau@alumni.scu.edu (H.C.); ukim@scu.edu (U.K.)

<sup>2</sup> Center for Nanostructures, Santa Clara University, Santa Clara, CA 95053, USA; rbarber@scu.edu

<sup>3</sup> Department of Physics, Santa Clara University, Santa Clara, CA 95053, USA

\* Correspondence: mmobedmiremadi@scu.edu; Tel.: +1-408-554-2731

Shown below is an accuracy error of 1.5 nm associated with the calibration block. The manufacturer rating of the block is set  $20 \pm 1.5$  nm.

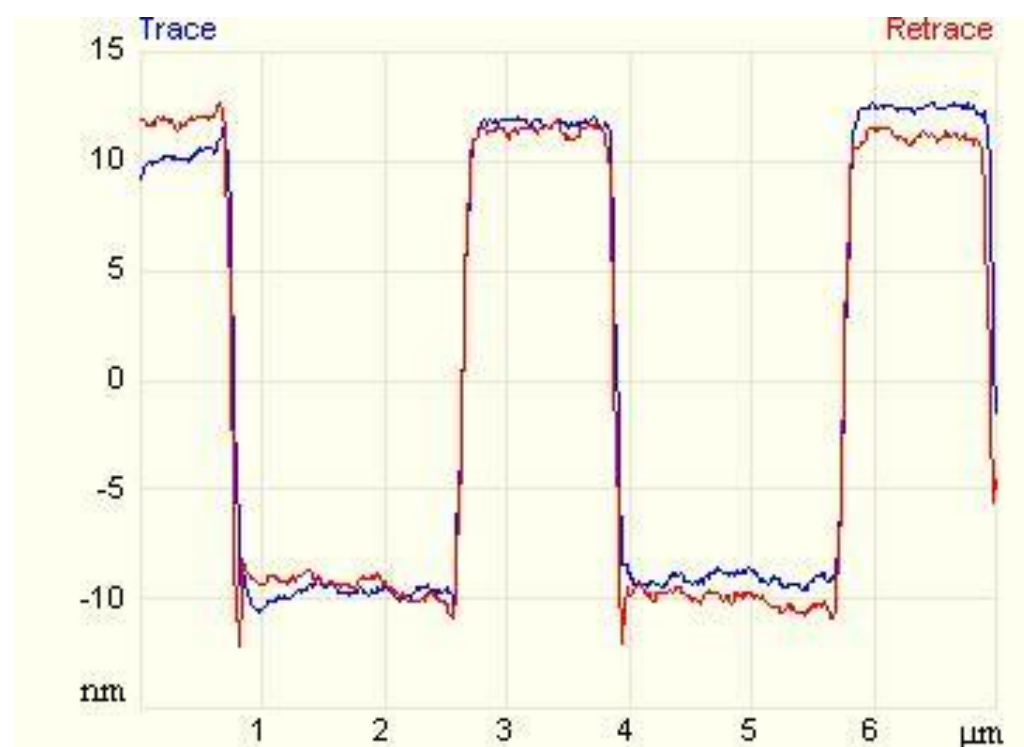

**Figure S1.** AFM scan corresponding to the calibration block. The step height for the calibration standard was measured to be  $21.4 \pm 1.5$  nm and a period (pitch) of  $3 \mu\text{m} \pm 0.01 \mu\text{m}$ .

**Citation:** Hadsell, A.; Chau, H.; Barber, R., Jr.; Kim, U.; Mobed-Miremadi, M. Supervised Learning for Predictive Pore Size Classification of Regenerated Cellulose Membranes Based on Atomic Force Microscopy Measurements. *Materials* **2021**, *14*, 6724. <https://doi.org/10.3390/ma14216724>

Academic Editor(s): Claudio Canale; Christian Müller

Received: 11 September 2021

Accepted: 4 November 2021

Published: 8 November 2021

**Publisher's Note:** MDPI stays neutral with regard to jurisdictional claims in published maps and institutional affiliations.

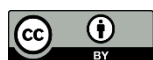

**Copyright:** © 2021 by the authors. Licensee MDPI, Basel, Switzerland. This article is an open access article distributed under the terms and conditions of the Creative Commons Attribution (CC BY) license (<http://creativecommons.org/licenses/by/4.0/>).

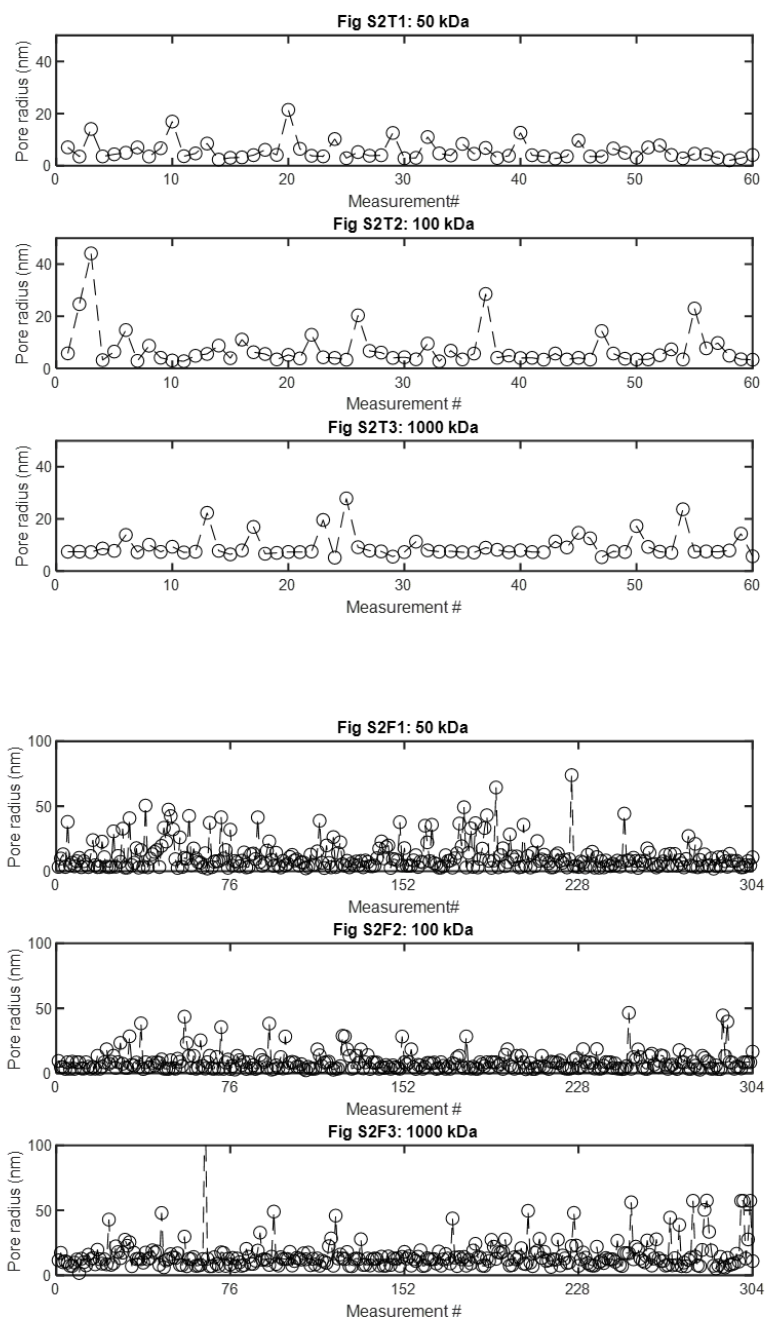

**Figure S2.** (A) Raw data for AFM pore size captured (T1–T3 tapping mode; F1–F3 fluid mode) chronologically across the examined sections (5 sections for tapping mode, 4 sections for fluid mode) showing random spikes across all 3 examined RC membranes. This data was subjected to the Fourier analysis for the detection of periodic instrument and environmental drifts ruled out due to poor adjusted correlation coefficients ( $R_{adj}^2 < 1$ ). Results are summarized in Table 3.

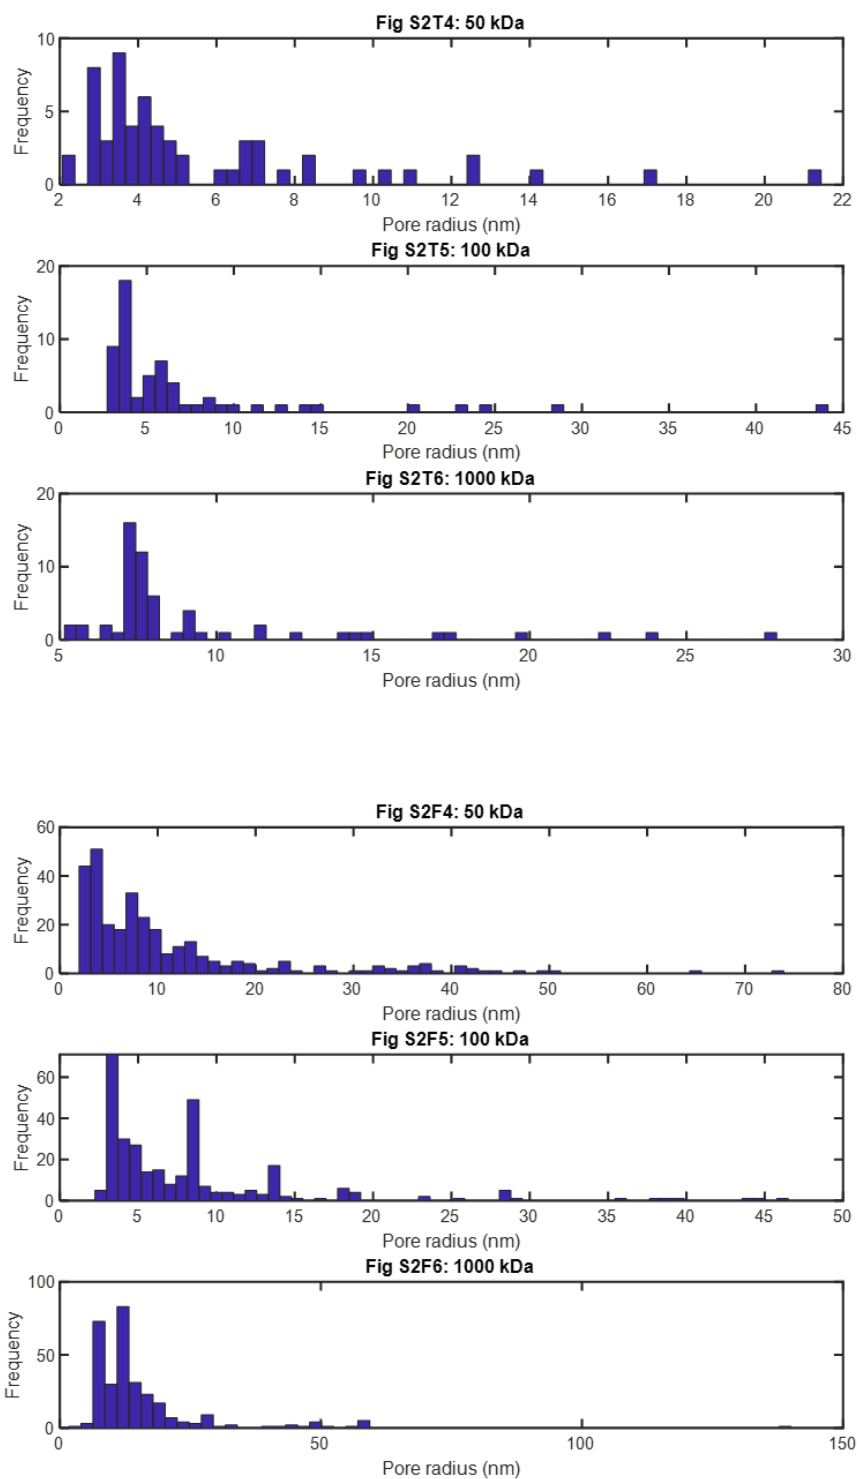

**Figure S2. (B)** Pore size frequency distribution (T4–T6 tapping mode; F4–F6 fluid mode) indicative of lack of Normality.

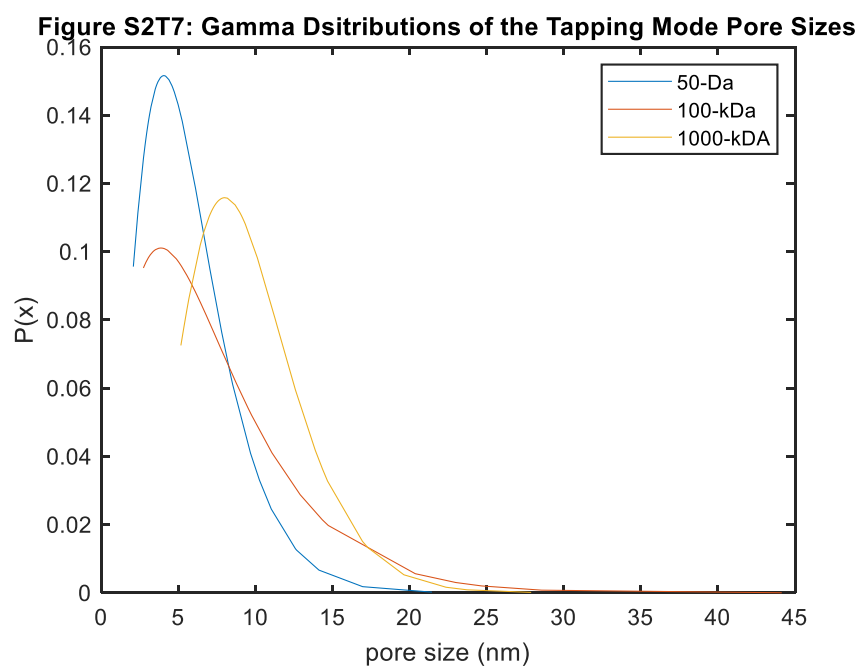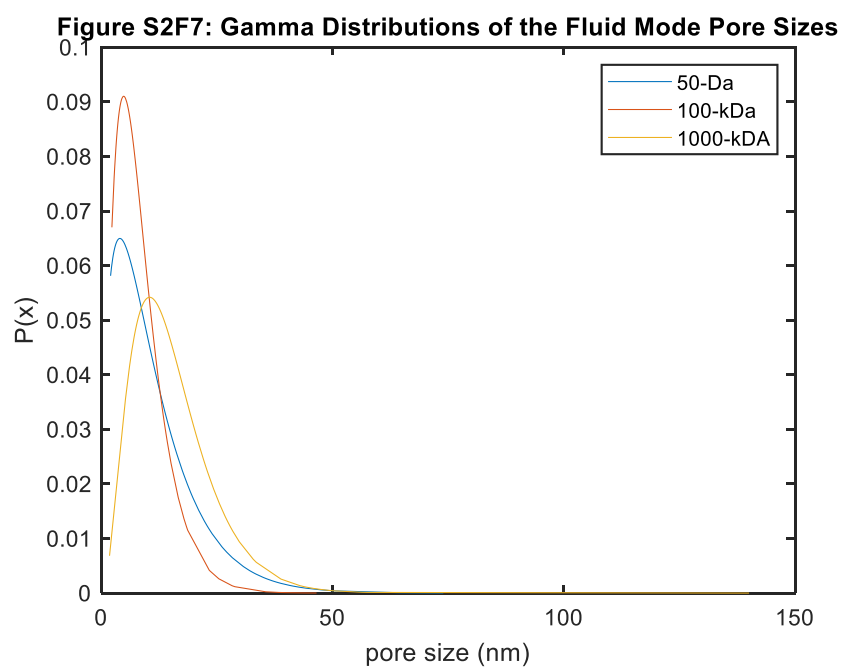

**Figure S2. (C)** Raw datasets fitted Gamma Distributions (Figure S2T7 tapping mode; Figure S2F7 fluid mode).

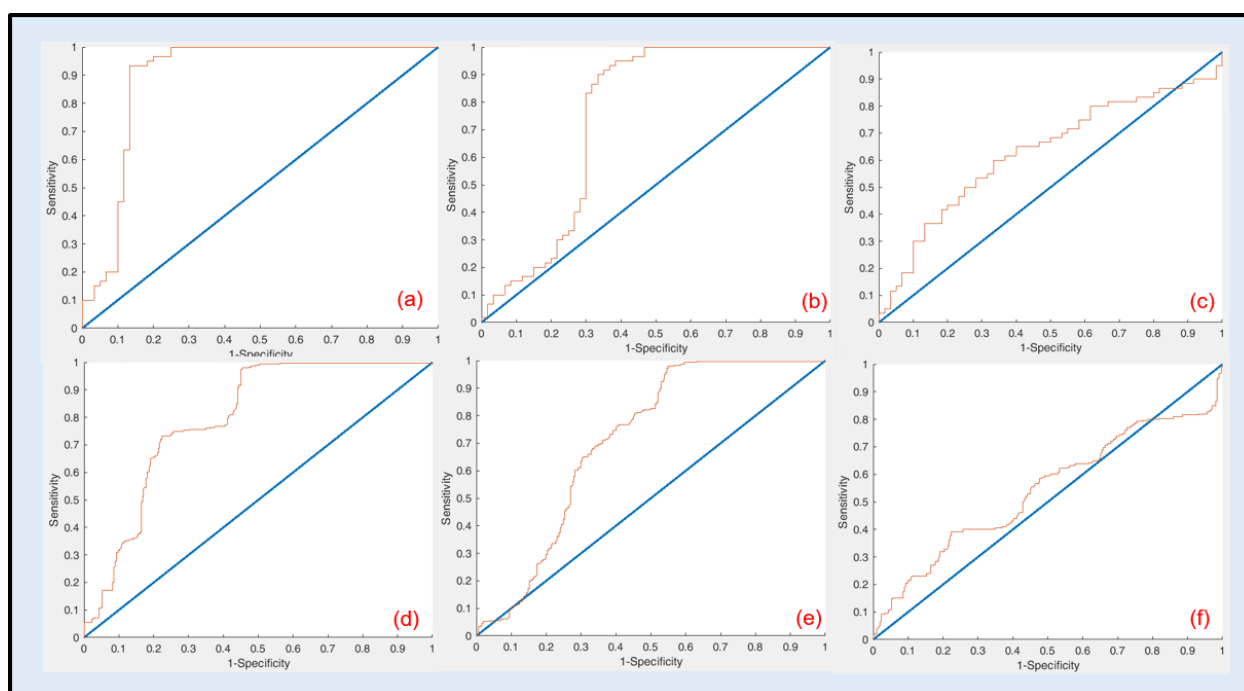

**Figure S3.** Receiver operating curves applied to the raw datasets. Top and bottom rows correspond to tapping and fluid modes, respectively: (a, d) 100 kDa vs 1000 kDa in tapping and fluid modes; (b, e) 50 kDa vs 1000 kDa in tapping and fluid modes; (c, f) 50 kDa vs 100 kDa in tapping and fluid modes. Corresponding AUCs are presented in Table 7.
